# Supplementary material
Source: Springer Nature journal article supplement (https://www.springermedizin.de/resource/supplementary/12913_2011_2312_MOESM1_ESM.pdf/9530200)
Supplement: MOESM1 [file 9530200]

Consider all QOF sections and indicators

Exclude non-clinical indicators and sections

Clinical section with 20 conditions and their indicators remain

Exclude indicators that are 'once-off' actions and conditions with <3 indicators

Eight clinical conditions and their indicators remain

Exclude indicators that are not directly under practice control to deliver and conditions with < 3 indicators

Six clinical conditions and their indicators remain

Exclude indicators that do not apply to all patients with condition and conditions with <3 indicators

Five clinical conditions and 36 indicators remain

Exclude 12 indicators that 'duplicate' actions

**Five clinical conditions and 24 indicators remain meeting all selection criteria**
